# Supplementary material
Source: PubMed Central journal article supplement (PMC7502595)
Supplement: develop-147-186015-s1.pdf [file develop-147-186015-s1.pdf]

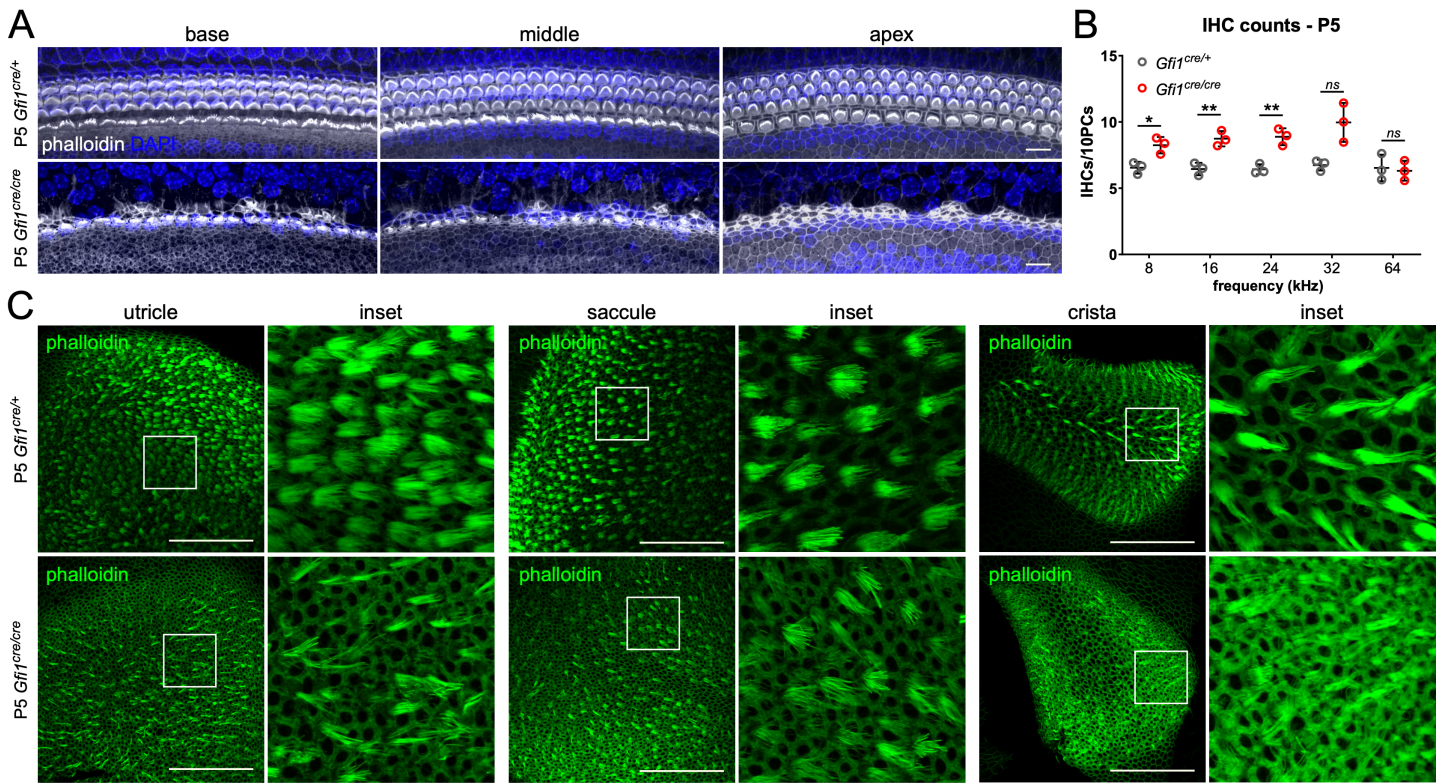

**Fig.S1. Progressive OHC degeneration and thinner vestibular hair bundles in the P5 GFI1 mutant inner ear.** (A) Phalloidin staining of HC bundles at P5 showed progressive OHC degeneration compared to P0 (n=3). Scale=20 $\mu$ m. (B) Quantification of IHCs at P5 revealed an increase in IHCs in both the middle and apical turns of the *Gfi1<sup>cre/cre</sup>* cochlea (n=3). (C) Phalloidin staining demonstrated thinner *Gfi1<sup>cre/cre</sup>* vestibular HC bundles also at P5 (n=3). Scale=50 $\mu$ m. \*=*p*-value<0.05, \*\*=*p*-value<0.01, ns=not significant. Statistical significance assessed by Welch's t-test.

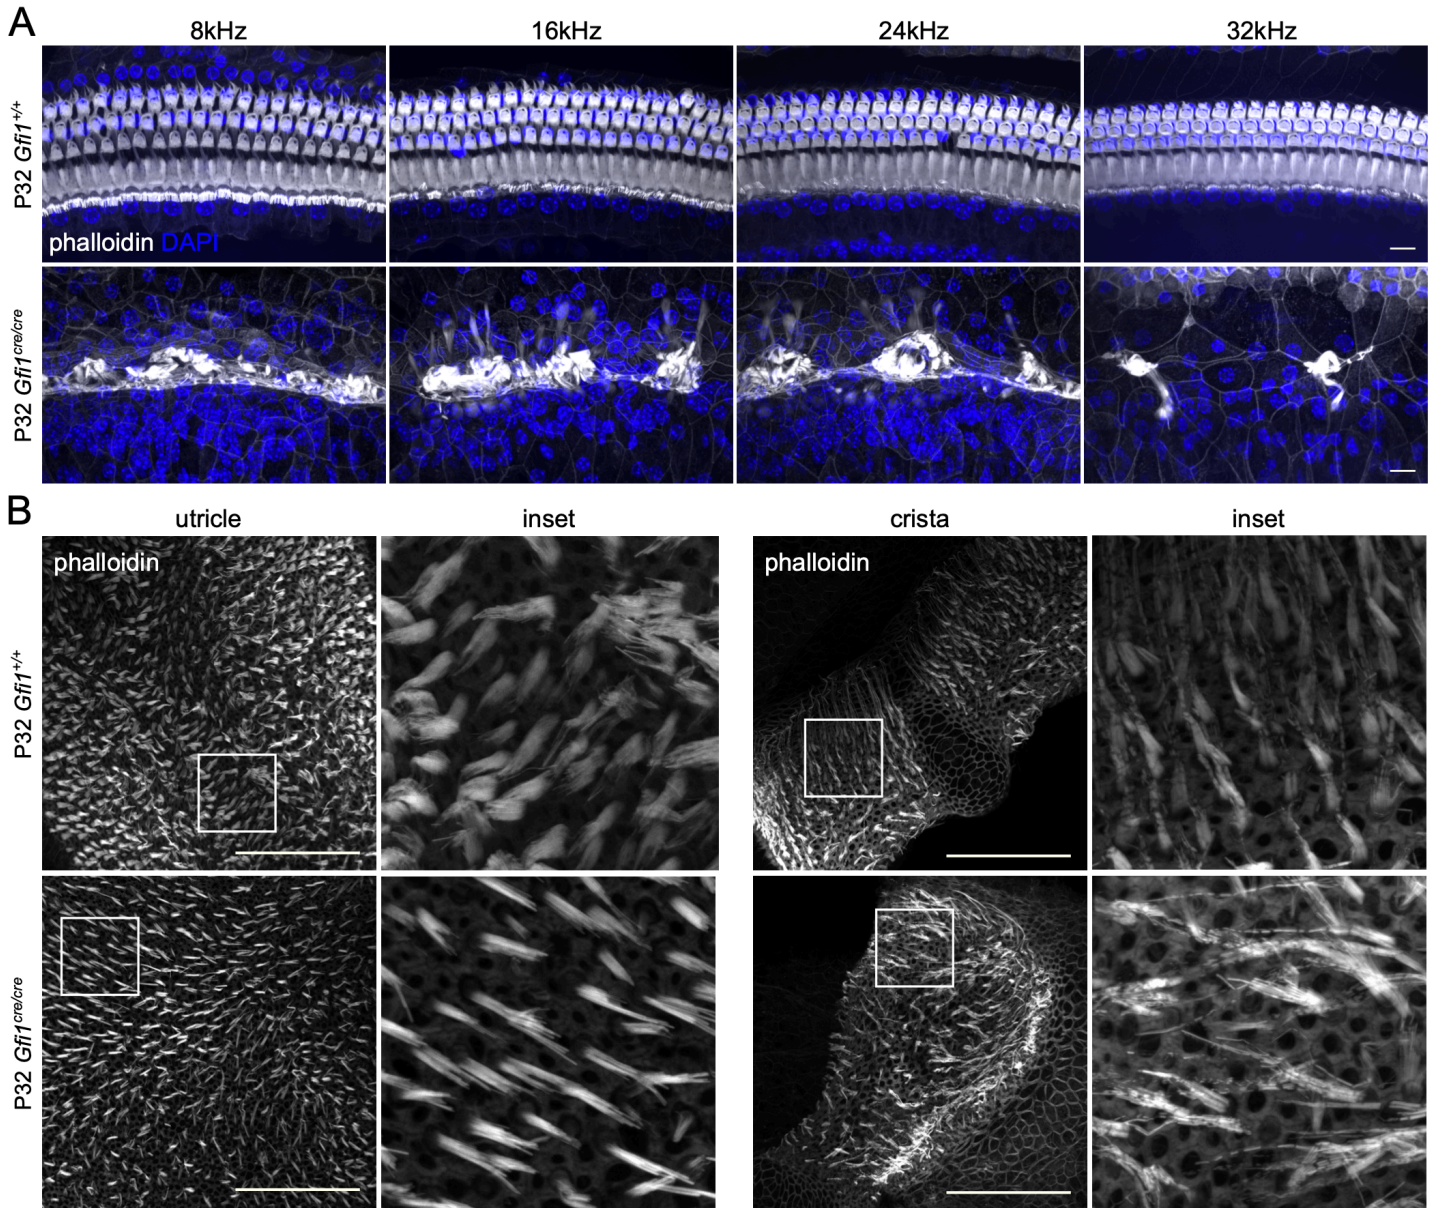

**Fig.S2. OHC and IHC degeneration and thinner vestibular hair bundles in the 1 month old GFI1 mutant ears.** (A) Phalloidin staining of HC bundles at 1 month showed OHC and IHC degeneration in the *Gfi1* mutants compared to wild type controls (n=3). Scale=20 $\mu$ m. (B) Phalloidin staining demonstrated thinner *Gfi1*<sup>cre/cre</sup> vestibular HC bundles also at 1 month (n=3). Scale=50 $\mu$ m.

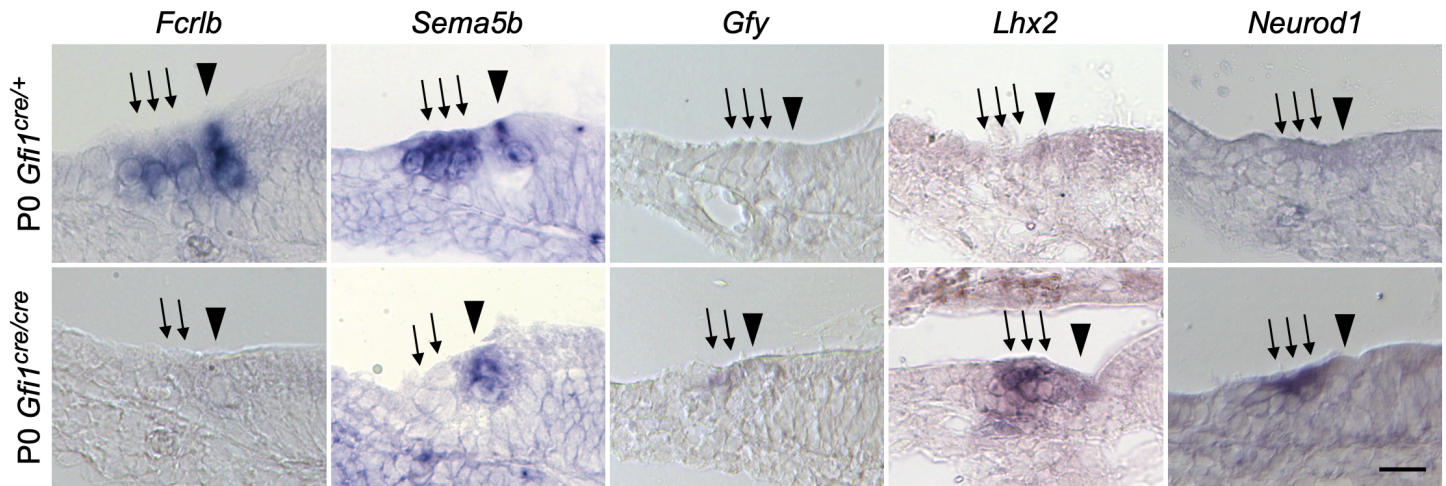

**Fig.S3. *In situ* hybridization of HC and neuronal-associated genes in the GFI1 mutant HCs.** HC-specific downregulation of *Fcrlb* and *Sema5b*, and upregulation of the neuronal-associated genes *Gfy*, *Lhx2*, *Neurod1* in *Gfi1<sup>cre/cre</sup>* cochlear HCs. Arrowheads denote IHCs, arrows denote OHCs. Scale=20 $\mu$ m.

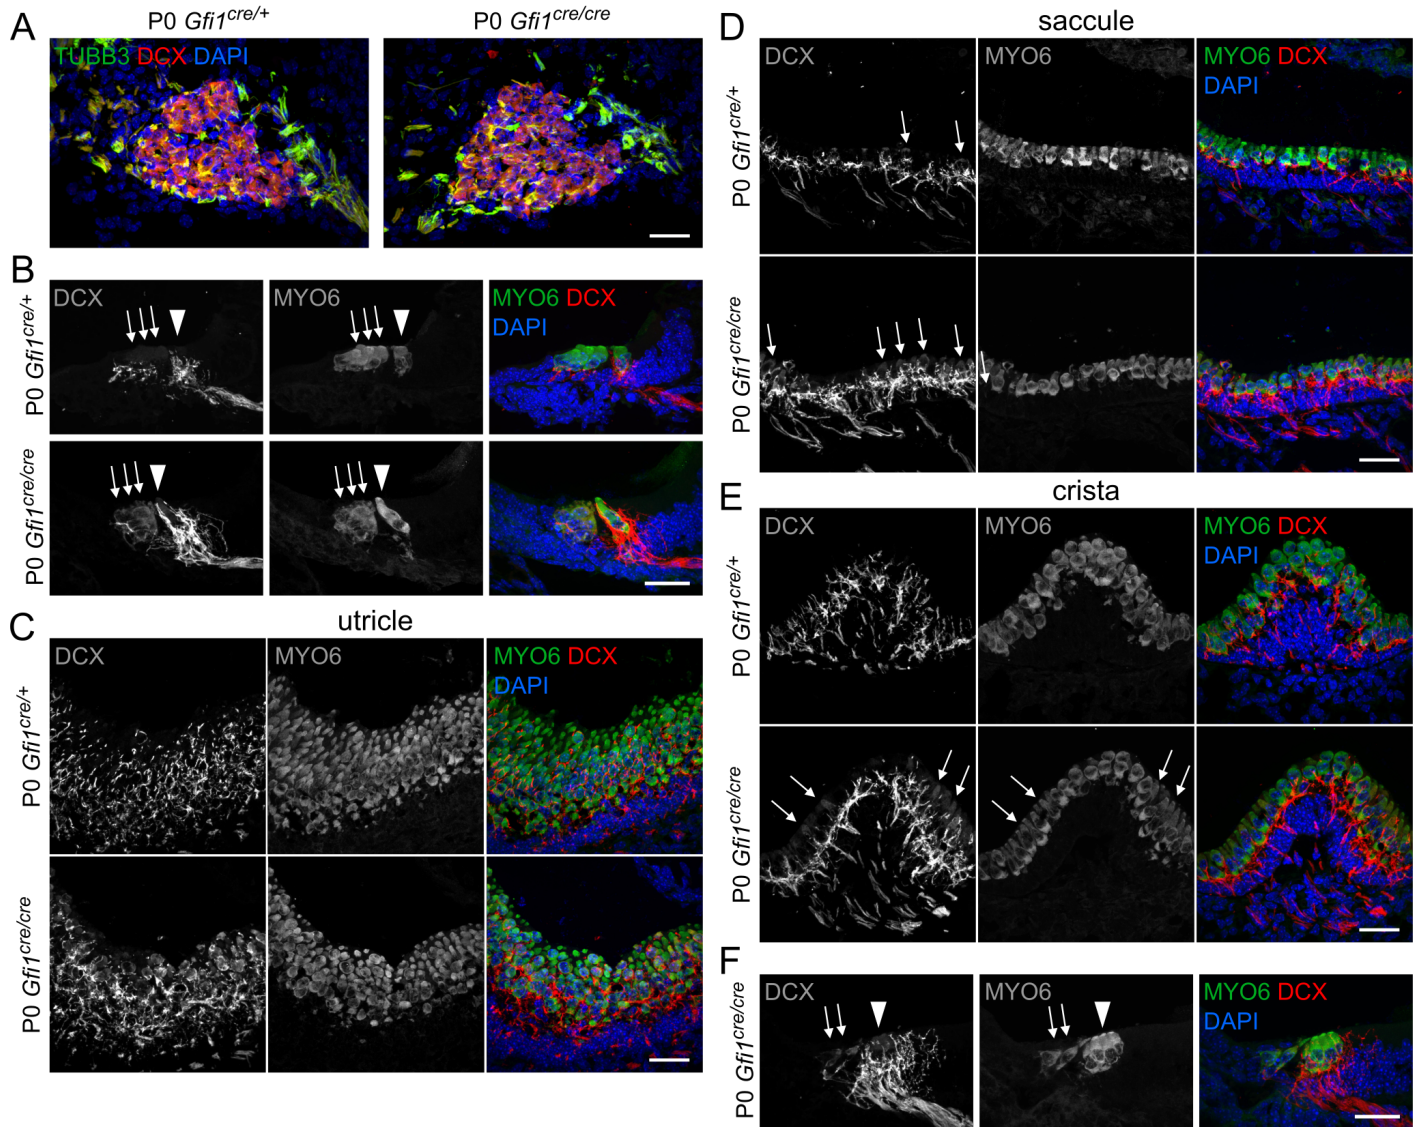

**Fig.S4. Upregulation of the neuronal marker DCX (doublecortin) in the GFI1 mutant HCs.** (A) DCX is expressed in neurons in both the *Gfi1*<sup>cre/+</sup> and *Gfi1*<sup>cre/cre</sup> cochlea. (B) DCX is expressed in the *Gfi1*<sup>cre/cre</sup> OHCs at P0, and overlaps with MYO6 expression (n=3). Arrowheads denote IHCs, arrows denote OHCs. (C-E) DCX is expressed in the *Gfi1*<sup>cre/cre</sup> vestibular HCs at P0. Occasionally, DCX staining was seen in vestibular HCs of the *Gfi1*<sup>cre/+</sup> animals (see D, saccule), but not to the extent of *Gfi1*<sup>cre/cre</sup>. (n=3, arrows denote DCX expression in HCs). (F) Occasionally, DCX staining was also observed in *Gfi1*<sup>cre/cre</sup> IHCs. Scale=20μm.

**Table S1. RNA-seq dataset measuring changes in gene expression between *Gfi1*<sup>cre/cre</sup> (HOM) and *Gfi1*<sup>cre/+</sup> (HET) cochlear hair cells in biological triplicate using RiboTag immunoprecipitation.** In addition to a cutoff of Log2 fold change (logR.Hom.vs.Het) > 1 or < -1 and false discovery rate (FDR) < 0.001, we required a full separation (Separation = Yes) of normalized expression values between replicates to call a gene as differentially expressed (DE, see methods for more detail).

[Click here to Download Table S1](#)

**Table S2. RNA-seq dataset measuring changes in gene expression between *Gfi1*<sup>cre/cre</sup> (HOM) and *Gfi1*<sup>cre/+</sup> (HET) vestibular hair cells in biological triplicate using RiboTag immunoprecipitation.** In addition to a cutoff of Log2 fold change (logR.Hom.vs.Het) > 1 or < -1 and false discovery rate (FDR) < 0.001, we required a full separation (Separation = Yes) of normalized expression values between replicates to call a gene as differentially expressed (DE, see methods for more detail).

[Click here to Download Table S2](#)

| #Sample ID   | Total Reads | Total Mapped Reads | Percent Mapped Reads | Percent Properly Paired | Uniquely Mapped Reads | Percent Exonic | Percent Intronic | Percent Intergenic |
|--------------|-------------|--------------------|----------------------|-------------------------|-----------------------|----------------|------------------|--------------------|
| HetIPV1      | 198797686   | 140034819          | 70.44                | 87.34                   | 130007929             | 88.05          | 7.11             | 4.84               |
| HetIPV1.down |             | 75665746           |                      |                         | 72822796              | 86.81          | 7.35             | 5.84               |
| HetIPV2      | 78107408    | 58755404           | 75.22                | 87.33                   | 55775036              | 82.53          | 12.29            | 5.18               |
| HetIPV3      | 93486052    | 71921316           | 76.93                | 88.05                   | 68268206              | 82.83          | 12.49            | 4.68               |
| HomIPV1      | 235153252   | 166579597          | 70.84                | 86.18                   | 157536060             | 89.24          | 5.89             | 4.87               |
| HomIPV1.down |             | 60081940           |                      |                         | 58636144              | 87.81          | 6.25             | 5.93               |
| HomIPV2      | 74915388    | 56582744           | 75.53                | 87.7                    | 52905966              | 85.74          | 9.33             | 4.93               |
| HomIPV3      | 80757870    | 58920296           | 72.96                | 86.5                    | 56051712              | 83.13          | 11.03            | 5.83               |
| HetIPC1      | 63936396    | 44112209           | 68.99                | 79.88                   | 43254231              | 33.73          | 59.96            | 6.31               |
| HetIPC2      | 67494692    | 45216432           | 66.99                | 79.41                   | 44399585              | 31.3           | 62.62            | 6.08               |
| HetIPC3      | 72095906    | 49467639           | 68.61                | 79.47                   | 48571130              | 35.56          | 58.63            | 5.81               |
| HomIPC1      | 70224610    | 49291915           | 70.19                | 80.62                   | 48463724              | 30.59          | 63.46            | 5.95               |
| HomIPC2      | 63536374    | 43675854           | 68.74                | 79.93                   | 42822328              | 33.54          | 60.22            | 6.24               |
| HomIPC3      | 68056790    | 46975426           | 69.02                | 79.33                   | 46137061              | 34.32          | 59.76            | 5.91               |

**Table S3. Alignment statistics for *Gfi1<sup>cre/cre</sup>* and *Gfi1<sup>cre/+</sup>* RiboTag RNA-seq replicates.** HetIPC = *Gfi1<sup>cre/+</sup>* immunoprecipitated RNA from cochlea, HomIPC = *Gfi1<sup>cre/cre</sup>* immunoprecipitated RNA from cochlea, HetIPV = *Gfi1<sup>cre/+</sup>* immunoprecipitated RNA from vestibule, HomIPV = *Gfi1<sup>cre/cre</sup>* immunoprecipitated RNA from vestibule. Upon noticing the high percent intronic reads obtained when using the Ovation® Ultralow Library Preparation Kit (NuGEN) for the cochlear IP sample, we switched to using the NEBNext® Ultra™ Directional RNA Library Prep Kit (New England BioLabs) for the vestibular IP samples. This resulted in a much lower percentage of intronic reads sequenced, consistent with the observations presented in Song et al., 2018. Additionally, two vestibular samples (HetIPV1, HomIPV1) were sequenced to a higher depth and randomly down sampled for our analysis (HetIPV1.down, HomIPV1.down).

| TaqMan probes                                                                                                                                                                                                                                                                                                                                                                                                                                                                                                                                                                                                              |                           |                           |
|----------------------------------------------------------------------------------------------------------------------------------------------------------------------------------------------------------------------------------------------------------------------------------------------------------------------------------------------------------------------------------------------------------------------------------------------------------------------------------------------------------------------------------------------------------------------------------------------------------------------------|---------------------------|---------------------------|
| <i>Actb</i> Mm12619580_g1; <i>Tbp</i> Mm01277042_m1; <i>Myo6</i> Mm00500651_m1; <i>Tubb3</i> Mm00727586_s1; <i>Pou3f4</i> Mm00447171_s1; <i>Fcrlb</i> Mm01295310_g1; <i>Ocm</i> Mm00712881_m1; <i>Atoh1</i> Mm00476035_s1; <i>St18</i> Mm01236999_m1; <i>Gfy</i> Mm04243347_g1; <i>Cdh1</i> Mm01247357; <i>Sema5b</i> Mm00443163_m1; <i>Slc26a5</i> Mm00446145_m1; <i>Strc</i> Mm01328720_m1; <i>Strip2</i> Mm00623363; <i>Gap43</i> Mm00500404_m1; <i>Tmc1</i> Mm00452982_m1; <i>Myt1</i> Mm00456190_m1; <i>Ncam1</i> Mm01149710_m1; <i>Lhx2</i> Mm00839783_m1; <i>Neurod1</i> Mm01280117_m1; <i>Insm1</i> Mm02581025_s1. |                           |                           |
| ISH probe primers                                                                                                                                                                                                                                                                                                                                                                                                                                                                                                                                                                                                          |                           |                           |
| Gene name                                                                                                                                                                                                                                                                                                                                                                                                                                                                                                                                                                                                                  | Forward                   | Reverse                   |
| <i>Neurod1</i>                                                                                                                                                                                                                                                                                                                                                                                                                                                                                                                                                                                                             | ACCTTTTAACAACAGGAAGTGGA   | GGGGACTGGTAGGAGTAGGG      |
| <i>Gfy</i>                                                                                                                                                                                                                                                                                                                                                                                                                                                                                                                                                                                                                 | CACTCCCAAGAATCCCTGAA      | GGTTGGTTCCAGTGCAGAAT      |
| <i>Lhx2</i>                                                                                                                                                                                                                                                                                                                                                                                                                                                                                                                                                                                                                | GAGAGTCCTCCAGGTCTGGTTT    | GCGACCGTTGGAGGGGTTT       |
| <i>Fcrlb</i>                                                                                                                                                                                                                                                                                                                                                                                                                                                                                                                                                                                                               | GTGGTGCTGCGCTGCGAGAC      | CTAGCTGTCCACTCGGCCCTCCA   |
| <i>Sema5b</i>                                                                                                                                                                                                                                                                                                                                                                                                                                                                                                                                                                                                              | GGCCTGCCCAGAAGGCTGGTCACTG | CACTGACAAGCTGGACGCAGCCCCG |

**Table S4.** Taqman probes used for qPCR and primers used to generate *in situ* hybridization probes.

#### Supplementary references

Song, Y., Milon, B., Ott, S., Zhao, X., Sadzewicz, L., Shetty, A., Boger, E. T., Tallon, L. J., Morell, R. J., Mahurkar, A., et al. (2018). A comparative analysis of library prep approaches for sequencing low input transcriptome samples. *BMC Genomics* **19**, 696.
